# Supplementary material for: Recalcitrance of cyanuric acid to oxidative degradation by OH radical: theoretical investigation
Source: Royal Society of Chemistry journal article supplement (doi:10.1039/c4ra04687k), 2014-01-01
Supplement: c4ra04687k1.pdf [file c4ra04687k1.pdf]

## Supporting Information

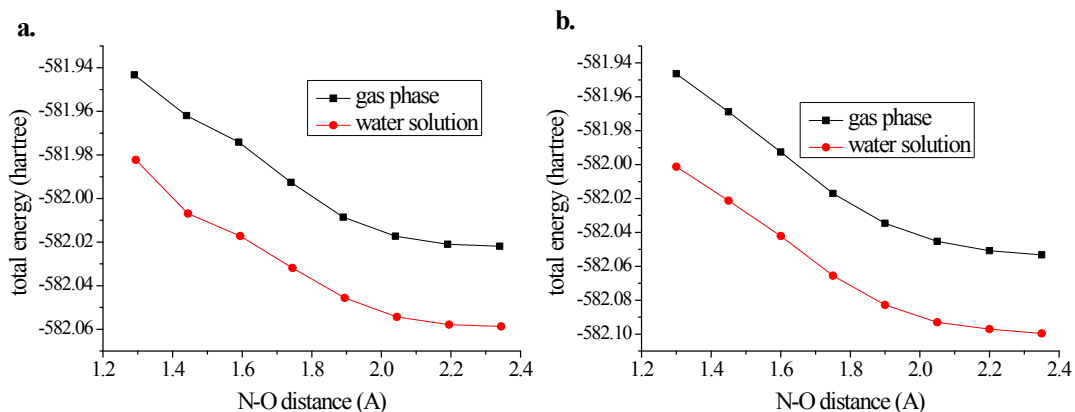

**Fig. S1** The scan of N-O in the addition of  $\cdot\text{OH}$  to the N-position of (a) CAe and (b) CAk.

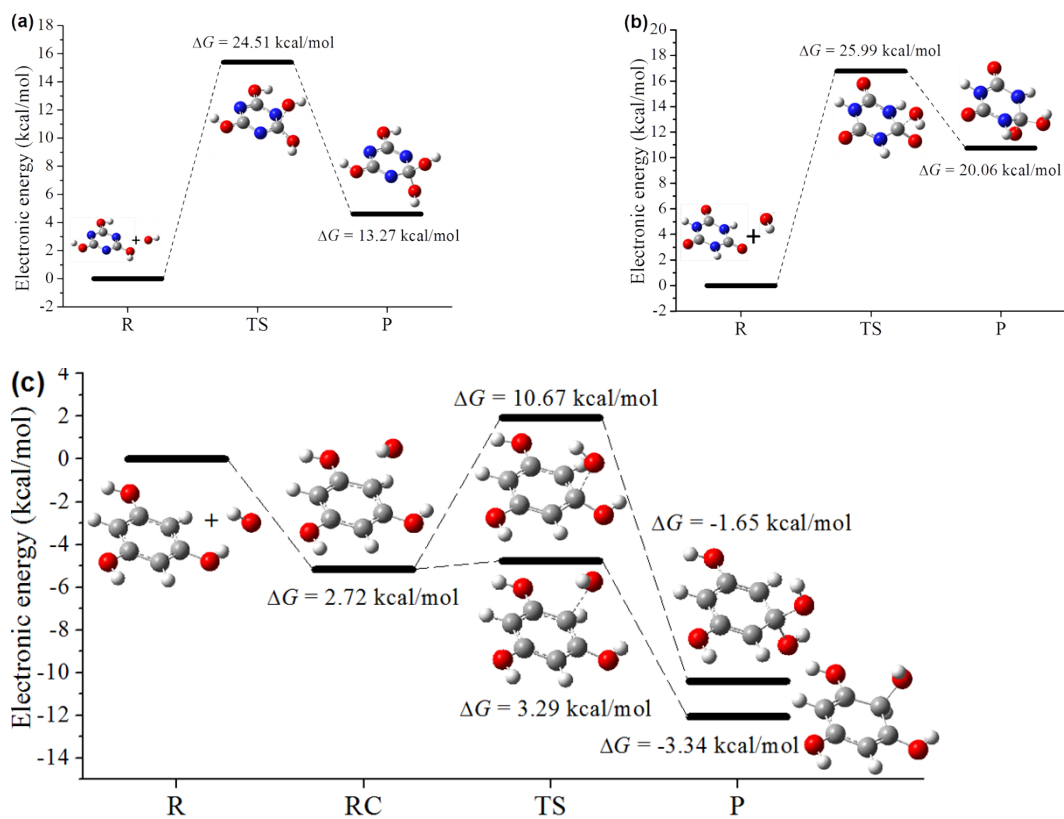

**Fig. S2** Energy diagrams for  $\cdot\text{OH}$  addition to (a) CAe, (b) CAk, and (c) BT in water solution.

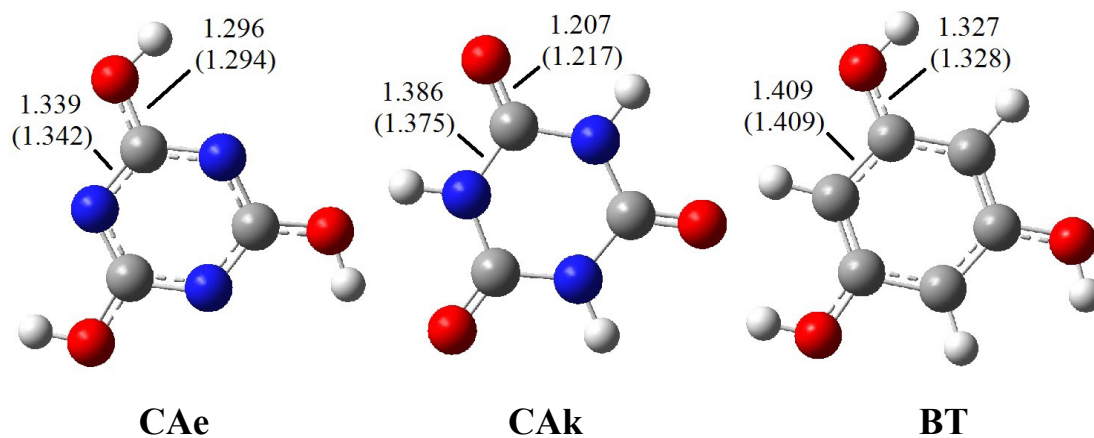

**Fig. S3** Optimized structures for the cationic radicals of CAe, CAk and BT in the gas phase and water solution (in parentheses) obtained at the B3LYP/6-311++G(d,p) level of theory. Atom representation: blue for N, gray for C, red for O, and white for H.
